# Supplementary material
Source: PubMed Central journal article supplement (PMC3910760)

Supplemental Material for Online Posting

Pharmacokinetics of Ganciclovir during Continuous Venovenous Haemodiafiltration in Critically Ill Patients

Legend to the figure

Fig. S 1.: Relationship between  $Cl_{tot}$  and  $Cl_{CVVHDF}$  of ganciclovir in the anuric patients undergoing CVVHDF (n = 9)

Tables:

Tab. S1: Patient characteristics

| <i>Patient Nr.</i> | <i>Sex</i> | <i>Age (years)</i> | <i>Ht (cm)</i> | <i>Bw (kg)</i> | <i>SAPS II</i> | <i>CMV-PCR (Plasma)</i> |
|--------------------|------------|--------------------|----------------|----------------|----------------|-------------------------|
| 1                  | M          | 59                 | 172            | 75             | 46             | positive                |
| 2                  | M          | 65                 | 178            | 85             | 72             | positive                |
| 3                  | M          | 51                 | 180            | 115            | 65             | positive                |
| 4                  | F          | 39                 | 160            | 41             | 53             | positive                |
| 5                  | M          | 49                 | 180            | 75             | 60             | negative                |
| 6                  | M          | 66                 | 180            | 120            | 72             | positive                |
| 7                  | M          | 60                 | 178            | 110            | 82             | positive                |
| 8                  | M          | 64                 | 180            | 75             | 40             | positive                |
| 9                  | M          | 51                 | 180            | 80             | 64             | positive                |

M, male; F, female; Ht, height; Bw, body weight;  
SAPS II, severity of disease classification system;  
CMV-PCR, CMV detection via polymerase chain reaction

Tab. S2: Haematological parameters

| <b>Haematological parameters</b> | <b>Day 1</b><br>(n=9) | <b>Day 2</b><br>(n=9) | <b>Day 3</b><br>(n=9) | <b>Day 4</b><br>(n=9) | <b>Day 5</b><br>(n=7) | <b>Day 6</b><br>(n=7) | <b>Day 7</b><br>(n=6) |
|----------------------------------|-----------------------|-----------------------|-----------------------|-----------------------|-----------------------|-----------------------|-----------------------|
| <i>RBC (T/l)</i>                 | 3 ± 0,3               | 3,1 ± 0,2             | 3,1 ± 0,3             | 3,2 ± 0,3             | 3,3 ± 0,2             | 3 ± 0,3               | 3,3 ± 0,4             |
| <i>HB (mg/dl)</i>                | 8,7 ± 1               | 9,5 ± 0,9             | 9,2 ± 0,8             | 9,6 ± 1               | 10 ± 0,7              | 9,1 ± 1               | 10 ± 1,2              |
| <i>PLT (G/l)</i>                 | 80 ± 70               | 83 ± 76               | 75 ± 86               | 94 ± 103              | 111 ± 124             | 105 ± 134             | 129 ± 118             |
| <i>WBC (G/l)</i>                 | 7,6 ± 6,3             | 8,5 ± 8,3             | 7,5 ± 6,2             | 8,5 ± 8,1             | 8,6 ± 10,7            | 6,6 ± 7,1             | 8,1 ± 8,5             |

RBC, red blood cells; HB, haemoglobin; PLT, platelets; WBC, white blood cells; values are expressed as mean (± SD); (baseline value = day 1).

Tab. S3: Ganciclovir individual pharmacokinetic parameter estimates from analysis with NONMEM<sup>®</sup> and WinNonlin<sup>®</sup>

| <i>Patient<br/>Nr.</i> | <i>AUC<sub>0-24 h</sub><br/>[mg·h/L]</i> |                              | <i>CL<sub>tot</sub><br/>[L/h]</i> |                              | <i>V<sub>D</sub><br/>[L]</i> |                              |
|------------------------|------------------------------------------|------------------------------|-----------------------------------|------------------------------|------------------------------|------------------------------|
|                        | <i>NONMEM<sup>®</sup></i>                | <i>WinNonlin<sup>®</sup></i> | <i>NONMEM<sup>®</sup></i>         | <i>WinNonlin<sup>®</sup></i> | <i>NONMEM<sup>®</sup></i>    | <i>WinNonlin<sup>®</sup></i> |
| 1                      | 106.43                                   | 104.3                        | 1.73                              | 1.76                         | 62.61                        | 63.11                        |
| 2                      | 106.83                                   | 103.9                        | 2.43                              | 2.48                         | 62.55                        | 64.99                        |
| 3                      | 93.99                                    | 87.96                        | 4.37                              | 4.51                         | 53.05                        | 94.88                        |
| 4                      | 84.43                                    | 75.48                        | 0.70                              | 1.16                         | 50.35                        | 50.31                        |
| 5                      | 122.34                                   | 117.4                        | 1.61                              | 1.63                         | 53.47                        | 57.48                        |
| 6                      | 73.53                                    | 67.83                        | 4.24                              | 4.19                         | 144.81                       | 167.4                        |
| 7                      | 91.79                                    | 87.18                        | 3.13                              | 3.2                          | 90.43                        | 100.4                        |
| 8                      | 88.59                                    | 86.64                        | 1.97                              | 1.78                         | 78.54                        | 90.63                        |
| 9                      | 100.98                                   | 97.43                        | 3.44                              | 3.67                         | 40.66                        | 41.79                        |

AUC<sub>0-24h</sub>, are under the curve from 0 to 24 hours; CL<sub>tot</sub>, total clearance; V<sub>D</sub>, volume of distribution

Tab. S4: Percentage of patients falling below the target-AUC of 50 mg·h/kg at least once during a course of seven ganciclovir administrations (1000 simulated patients)

| <i>Dosage regimen</i> | <i>AUC &gt; 50 mg·h/kg</i> |
|-----------------------|----------------------------|
| 5 mg/kg/24h           | 1.1%                       |
| 2.5 mg/kg/24h         | 13.8%                      |
| 1.5 mg/kg/12h         | 37.6%                      |

AUC, area under the curve

Figure:  
Fig. S1

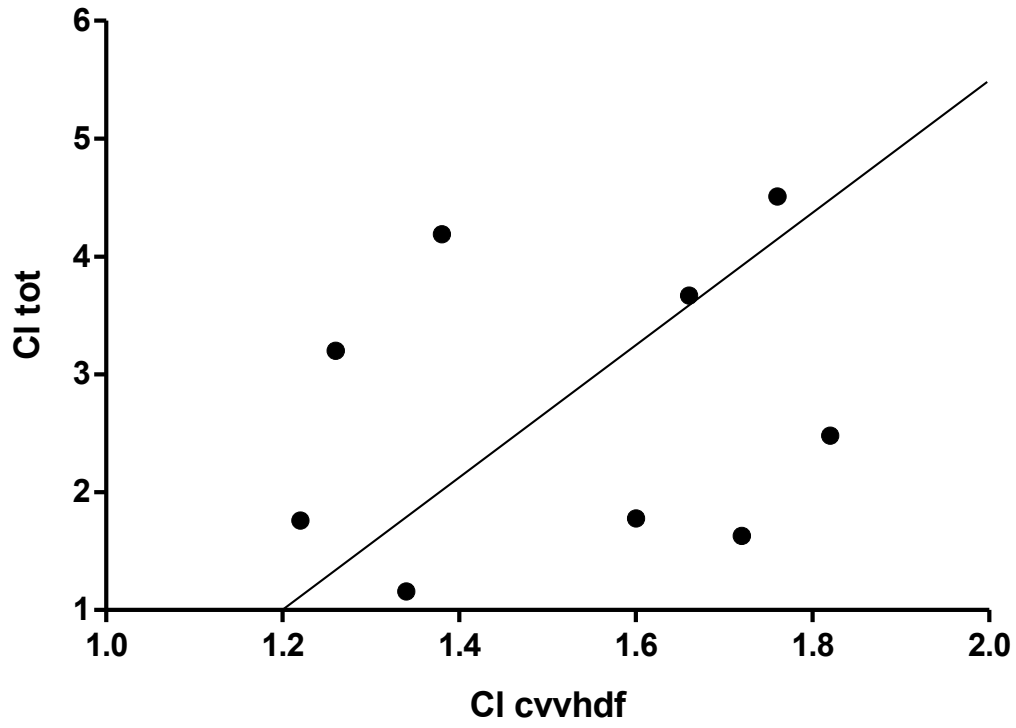

Supplement: AAC.00892-13_zac001142465so1.pdf [file AAC.00892-13_zac001142465so1.pdf]
